# Supplementary material
Source: PubMed Central journal article supplement (PMC3091418)
Supplement: NIHMS34142-supplement-01.pdf [file NIHMS34142-supplement-01.pdf]

## Supplementary Material

**Table S1.** Similarity values (%) of 16S rRNA gene sequences (*E.coli* positions 33-1467) between type strains of type species of the six most closely related genera (see Fig. 2) to the proposed genus *Limnohabitans* gen. nov. (strain MWH-C5<sup>T</sup>). For strain designations and sequence accession numbers of reference strains see Fig. 2).

|                                  | <i>Po. vacu.</i> | <i>Va. para</i> | <i>Ca. kore.</i> | <i>Cu. grac.</i> | <i>Ps. soli</i> | <i>Rh. ferm.</i> | <i>Ra. tata.</i> | MWH-C5 <sup>T</sup> |
|----------------------------------|------------------|-----------------|------------------|------------------|-----------------|------------------|------------------|---------------------|
| <i>Polaromonas vacuolata</i>     | 100              | 95.3            | 94.7             | 95.3             | 94.0            | 94.1             | 93.0             | 94.4                |
| <i>Variovorax paradoxus</i>      |                  | 100             | 96.5             | 96.4             | 95.8            | 95.9             | 95.6             | 95.2                |
| <i>Caenimonas koreensis</i>      |                  |                 | 100              | 96.5             | 95.0            | 94.8             | 96.0             | 95.2                |
| <i>Curvibacter gracilis</i>      |                  |                 |                  | 100              | 96.5            | 95.9             | 96.0             | 96.2                |
| <i>Pseudorhodoferrax soli</i>    |                  |                 |                  |                  | 100             | 96.1             | 95.2             | 95.9                |
| <i>Rhodoferrax fermentans</i>    |                  |                 |                  |                  |                 | 100              | 94.4             | 95.3                |
| <i>Ramlibacter tataouinensis</i> |                  |                 |                  |                  |                 |                  | 100              | 95.1                |
| MWH-C5 <sup>T</sup>              |                  |                 |                  |                  |                 |                  |                  | 100                 |

**Table S2.** Family-wide comparison of chemotaxonomic traits. The presented data were obtained from Mechichi *et al.*, 2003 (*Alicycliphilus*), Takeda *et al.*, 2002 (*Caldimonas*), Ryu *et al.*, 2008 (*Caenimonas* and other genera), Xie and Yokota, 2005 (*Pelomonas*) Gomila *et al.*, 2007 (*Pelomonas*), Pham *et al.*, 2009 (*Diaphorobacter*), Heulin *et al.*, 2003 (*Ramlibacter*), Franca *et al.*, 2006 (*Tepidicella*), Pinel *et al.*, 2008 (*Verminephrobacter*), Elbanna *et al.*, 2003 (*Schlegelella*), Spring *et al.*, 2005 (*Malikia*, *Macromonas*, *Hydrogenophaga*), Blümel *et al.*, 2001 (*Xenophilus* and other genera), Bruland *et al.*, in press (*Pseudorhodoferox*), Spring *et al.*, 2004 (*Ottowia*, *Hylemonella*, *Alicycliphilus*, *Brachymonas*), Lee *et al.*, 2004 (*Lampropedia*), Gomila *et al.*, 2008 (*Roseateles*), Kämpfer *et al.*, 2008 (*Pseudacidovorax*). NA, not available; feat., feature; cy., cyclo; Q, quinone; RQ, rhodoquinone. 1, strain MWH-C5T; 2, *Acidovorax*; 3, *Alicycliphilus*; 4, *Brachymonas*; 5, *Caenimonas*; 6, *Caldimonas*; 7, *Comamonas*; 8, *Curvibacter*; 9, *Delftia*; 10, *Diaphorobacter*; 11, *Giesbergeria*; 12, *Hydrogenophaga*; 13, *Hylemonella*; 14, *Lampropedia*; 15, *Macromonas*; 16, *Malikia*; 17, *Ottowia*; 18, *Pelomonas*; 19, *Polaromonas*; 20, *Pseudacidovorax*; 21, *Pseudorhodoferox*; 22, *Ramlibacter*; 23, *Rhodoferox*; 24, *Roseateles*; 25, *Schlegelella*; 26, *Simplicispira*; 27, *Tepidicella*; 28, *Variovorax*; 29, *Verminephrobacter*; 30, *Xenophilus*.

| Characteristics                   | 1                    | 2                        | 3    | 4             | 5                       | 6                    | 7                    | 8                    | 9                    | 10                            | 11                   | 12                                   | 13                   | 14                   | 15                   | 16                   | 17                   | 18                   | 19                   | 20                      | 21      | 22                      | 23  | 24                   | 25                   | 26               | 27                   | 28                       | 29                   | 30                       |                      |
|-----------------------------------|----------------------|--------------------------|------|---------------|-------------------------|----------------------|----------------------|----------------------|----------------------|-------------------------------|----------------------|--------------------------------------|----------------------|----------------------|----------------------|----------------------|----------------------|----------------------|----------------------|-------------------------|---------|-------------------------|-----|----------------------|----------------------|------------------|----------------------|--------------------------|----------------------|--------------------------|----------------------|
| <b>Quinones</b>                   | Q-8                  | Q-8                      | NA   | Q-8<br>RQ-8   | Q-8                     | Q-8                  | Q-8                  | Q-8                  | Q-8                  | Q-8                           | Q-8                  | Q-8                                  | Q-8                  | NA                   | NA                   | Q-8                  | Q-8                  | Q-8                  | Q-8                  | Q-9                     | NA      | NA                      | NA  | Q-8<br>RQ-8          | Q-8                  | NA               | Q-8                  | Q-8                      | Q-8                  | NA                       | Q-8                  |
| <b>Major fatty acids</b>          | 16:0<br>16:1<br>18:1 | 16:0<br>16:1             | NA   | 16:0.<br>16:1 | 16:0<br>18:1<br>feat. 3 | 16:0<br>16:1<br>18:1 | 16:0<br>16:1<br>18:1 | 16:0<br>16:1<br>18:1 | 16:0<br>16:1<br>18:1 | 16:0<br>17:0 cy.<br>feat. 4+7 | 16:0<br>16:1<br>18:1 | 16:0<br>16:1<br>18:0<br>10:1<br>17:0 | 16:0<br>16:1<br>18:1 | 14:0<br>16:0<br>18:1 | 16:1<br>17:1<br>18:1 | 16:0<br>16:1<br>18:1 | 16:0<br>16:1<br>18:1 | 16:0<br>16:1<br>18:1 | 16:0<br>16:1<br>18:1 | 16:0<br>18:1<br>feat. 3 | NA      | 16:0<br>18:1<br>feat. 3 | NA  | 16:0<br>16:1<br>18:1 | 16:0<br>16:1<br>18:1 | 16:0<br>17:0 cy. | 16:0<br>16:1<br>18:1 | 16:0<br>18:1<br>17:0 cy. | 16:0<br>16:1<br>18:1 | 16:0<br>16:1<br>17:0 cy. | 16:0<br>16:1<br>18:1 |
| <b>Major 3-OH acid</b>            | 8:0                  | 10:0<br>8:0 <sup>s</sup> | 10:0 | 10:0          | 10:0                    | 10:0                 | 10:0                 | 8:0                  | 10:0                 | 10:0                          | 10:0                 | 8:0<br>10:0                          | 10:0<br>12:0         | 10:0                 | 8:0                  | 8:0                  | 10:0                 | 10:0                 | 8:0                  | 8:0                     | 10:0    | NA                      | 8:0 | 10:0                 | 10:0                 | 10:0             | 10:0                 | 8:0                      | 10:0                 | 10:0                     | 8:0                  |
| <b>DNA G+C content<br/>(mol%)</b> | 56                   | 62<br>-                  | 66   | 63<br>-       | 63                      | 66                   | 63                   | 62                   | 67                   | 63 - 65                       | 57                   | 65                                   | 65                   | 61                   | 68                   | 66                   | 59                   | 59                   | 52                   | 70                      | 69 - 70 | 67                      | 59  | 66                   | 69 - 70              | 63               | 65                   | 66                       | 67                   | 70                       |                      |
|                                   |                      | 70                       |      | 65            |                         |                      | 66                   | 66                   | 69                   |                               | 60                   | 69                                   |                      | 67                   |                      | 67                   |                      |                      | 63                   |                         |         | 70                      | 62  |                      |                      | 65               | 69                   |                          |                      |                          |                      |

\* Present in for *S.*

*psychrophila.*

<sup>s</sup> Present in phytopathogenic species

## References

- Blümel, S., Busse, H.-J., Stolz, A. & Kämpfer, P. (2001).** *Xenophilus azovorans* gen. nov., sp. nov., a soil bacterium that is able to degrade azo dyes of the Orange II type. *Int J Syst Evol Microbiol* **51**, 1831–1837.
- Bruland, N., Bathe, S., Willems, A. & Steinbüchel, A.** *Pseudorhodoferox soli* gen. nov., sp. nov., and *Pseudorhodoferox caeni* sp. nov., two novel *Betaproteobacteria* belonging to the *Comamonadaceae* family. *Int J Syst Evol Microbiol* (in press).
- Elbanna, K., Lütke-Eversloh, T., van Trappen, S., Mergaert, J., Swings, J. & Steinbüchel, A. (2003).** *Schlegelella thermodepolymerans* gen. nov., sp. nov., a novel thermophilic bacterium that degrades poly(3-hydroxybutyrate-co-3-mercaptopropionate). *Int J Syst Evol Microbiol* **53**, 1165–1168.
- Franca, L., Rainey, F. A., Nobre, M. F. & Da Costa, M. S. (2006).** *Tepidicella xavieri* gen. nov., sp. nov., a betaproteobacterium isolated from a hot spring runoff. *Int J Syst Evol Microbiol* **56**, 907-912.
- Gomila, M., Bowien, B., Falsen, E., Moore, E. R. B. & Lalucat, J. (2007).** Description of *Pelomonas aquatica* sp. nov. and *Pelomonas puraquae* sp. nov., isolated from industrial and haemodialysis water. *Int J Syst Evol Microbiol* **57**, 2629–2635.
- Gomila, M., Bowien, B., Falsen, E., Moore, E. R. B. & Lalucat, J. (2008).** Description of *Roseateles aquatilis* sp. nov. and *Roseateles terrae* sp. nov., in the class *Betaproteobacteria*, and emended description of the genus *Roseateles*. *Int J Syst Evol Microbiol* **58**, 6 - 11.
- Heulin, T., Barakat, M., Christen, R., Lesourd, M., Sutra, L., De Luca, G. & Achouak, W. (2003).** *Ramlibacter tataouinensis* gen. nov., sp. nov., and *Ramlibacter henchirensis* sp. nov., cyst-producing bacteria isolated from subdesert soil in Tunisia. *Int J Syst Evol Microbiol* **53**, 589–594.

- Kämpfer, P., Thummes, K., Chu, H. I., Tan, C.-C., Arun, A. B., Chen, W.-M., Lai, W.-A., Shen, F.-T., Rekha, P. D. & Young, C.-C. (2008).** *Pseudacidovorax intermedius* gen. nov., sp. nov., a novel nitrogen-fixing betaproteobacterium isolated from soil. *Int J Syst Evol Microbiol* **58**, 491-495.
- Lee, N., Cellamare, C.M., Bastianutti, C., Rossello-Mora, R., Kämpfer, P., Ludwig, W., Schleifer, K. H. & Stante, L. (2004).** Emended description of the species *Lamproedia hyalina*. *Int J Syst Evol Microbiol* **54**, 1709-1715.
- Mechichi, T., Stackebrandt, E. & Fuchs, G. (2003).** *Alicyclophilus denitrificans* gen. nov., sp. nov., a cyclohexanol-degrading, nitrate-reducing  $\beta$ -proteobacterium. *Int J Syst Evol Microbiol* **53**, 147-152.
- Pham, V. H., Park, S.-J., Roh, Y., Roh, D.-H. & Rhee, S.-K. (2009).** *Diaphorobacter oryzae* sp. nov., isolated from a thiosulfate-oxidizing enrichment culture. *Int J Syst Evol Microbiol* **59**, 218-221.
- Pinel, N., Davidson, S. K. & Stahl, D. A. (2008).** *Verminephrobacter eiseniae* gen. nov., sp. nov., a nephridial symbiont of the earthworm *Eisenia foetida* (Savigny). *Int J Syst Evol Microbiol* **58**, 2147-2157.
- Ryu, S. H., Lee, D. S., Park, M., Wang, Q., Jang, H. H., Park, W. & Jeon, C. O. (2008).** *Caenimonas koreensis* gen. nov., sp. nov., isolated from activated sludge. *Int J Syst Evol Microbiol* **58**, 1064-1068.
- Spring, S., Wagner, M., Schumann, P. & Kämpfer, P. (2005).** *Malikia granosa* gen. nov., sp. nov., a novel polyhydroxyalkonate- and polyphosphate-accumulating bacterium isolated from activated sludge and reclassification of *Pseudomonas spinosa* as *Malikia spinosa* comb. nov. *Int J Syst Evol Microbiol* **55**, 621-629.
- Spring, S., Jäckel, U., Wagner, M. & Kämpfer, P. (2004).** *Ottowia thiooxydans* gen. nov., sp. nov.,

a novel facultatively anaerobic, N<sub>2</sub>O-producing bacterium isolated from activated sludge, and transfer of *Aquaspirillum gracile* to *Hylemonella gracilis* gen. nov., comb. nov. *Int J Syst Evol Microbiol* **54**, 99–106.

**Takeda, M., Kamagata, Y., Ghiorse, W. C., Hanada, S. & Koizumi, J. (2002).** *Caldimonas manganoxidans* gen. nov., sp nov., a poly(3-hydroxybutyrate)-degrading, manganese-oxidizing thermophile. *Int J Syst Evol Microbiol* **52**, 895–900.

**Xie, C. H. & Yokota, A. (2005).** Reclassification of *Alcaligenes latus* strains IAM 12599T and IAM 12664 and *Pseudomonas saccharophila* as *Azohydromonas lata* gen. nov., comb. nov., *Azohydromonas australiaca* sp. nov. and *Pelomonas saccharophila* gen. nov., comb. nov. respectively. *Int J Syst Evol Microbiol* **55**, 2419–2425.

**Fig. S1.** Neighbour-joining (NJ) tree (Kimura-2 correction) based on almost complete 16S rRNA gene sequences, showing the phylogenetic relationship of *Limnohabitans curvus* gen. nov, sp. nov. with uncultured bacteria inhabiting various freshwater systems and estuaries. The sequences of uncultured bacteria were retrieved from GenBank by BLAST search with the sequence of strain MWH-C5<sup>T</sup> as query sequence. Only a part of the BLAST hits > 95% sequence similarity are presented in the tree. The so-called “Rhodoferax sp. BAL47” cluster (Zwart et al., 2002) is indicated by the bracket at the right. Bootstrap values  $\geq 60\%$  (1000 iterations) are depicted. The tree was rooted by using archeal sequences (not shown). Bar, 5 nucleotide substitution per 100 nucleotides.
